# Supplementary material for: Isolation of Acanthamoeba T5 from Water: Characterization of Its Pathogenic Potential, Including the Production of Extracellular Vesicles
Source: MDPI journal article supplement (doi:10.3390/pathogens9020144), 2020-02-21
Supplement: s1 [file s1]

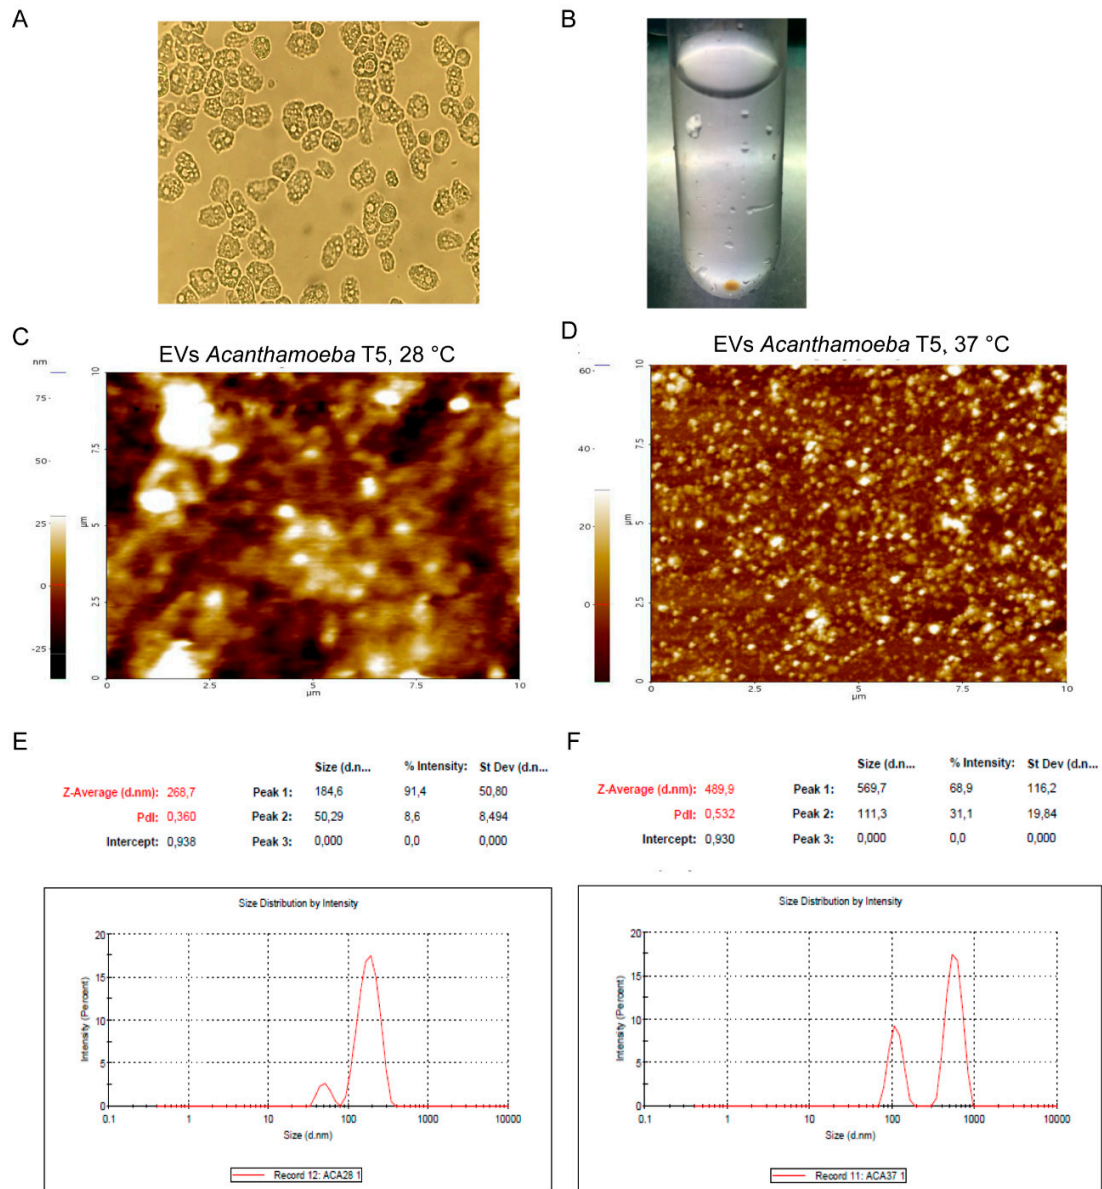

Figure S1. Isolation of EVs of *Acanthamoeba* T5 using differential centrifugation: A) *Acanthamoeba* T5 in PYG medium, B) final pellet obtained after the centrifugation of the *Acanthamoeba* T5 supernatant at 100,000 xg for 18 h, C) AFM topography images of EVs of *Acanthamoeba* T5 incubated at 28 °C, D) AFM topography images of EVs of *Acanthamoeba* T5 incubated at 37 °C, E) DLS of EVs of *Acanthamoeba* T5 incubated at 28 °C and F) DLS of EVs of *Acanthamoeba* T5 incubated at 37 °C. The vesicle population size of  $569.5 \pm 116.2$  nm could correspond to aggregates of EVs.
